# Supplementary material for: Carboxylate complexation by 1,1′-(1,2-phenylene)bis(3-phenylurea) in solution and the solid state
Source: Royal Society of Chemistry journal article supplement (doi:10.1039/b508144k), 2005-01-01

## Carboxylate complexation in 1,1'-(1,2-phenylene)bis(3-phenylurea) in solution and in the solid state

Simon J. Brooks, Philip A. Gale\* and Mark E. Light

### Supplementary information

#### 1,1'-(1,2-phenylene)bis(3-phenylurea) (**3**).

To a stirring solution of 1,2-phenylenediamine (0.68 g, 6.5 mmol) in dry dichloromethane (100 mL) was slowly added phenylisocyanate (1.36 mL, 13.0 mmol). The reaction was heated at reflux under a nitrogen

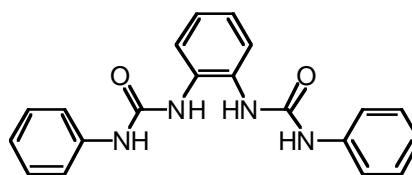

atmosphere for 16 hours. The resulting white precipitate was removed via filtration and washed with petroleum ether (20 mL) followed by DCM (20 mL). White solid product dried under high vacuum. Mass of product = 2.15 g, 6.2 mmol. Yield = 96 %.  $^1\text{H}$  NMR – 300 MHz (DMSO- $d_6$ ): 9.06 (s, 2H, urea NH), 8.06 (s, 2H, urea NH), 7.60 (m, 2 H, aryl CH), 7.45 (dd, 4H, aryl CH,  $J = 8.4$  & 1.1 Hz), 7.26 (m, 4H, aryl CH), 7.08 (m, 2H, aryl CH), 6.96 (m, 2H, aryl CH).  $^{13}\text{C}$  NMR - 75 MHz (DMSO- $d_6$ ): 153.2, 139.8, 131.2, 128.7, 123.96, 123.93, 121.73, and 118.14. LRMS (ES): 458.9 [  $\text{M} + \text{TFA} - \text{H}$  ], 472.8 [  $\text{M} + \text{HCO}_2\text{H} + 2\text{MeCN} - \text{H}$  ], 727.0 [  $2\text{M} + \text{Cl}$  ], 804.9 [  $2\text{M} + \text{TFA} - \text{H}$  ], 1073.7 [  $3\text{M} + \text{Cl}$  ], 1420.6 [  $4\text{M} + \text{Cl}$  ]. IR ( $\text{cm}^{-1}$ ): 3276, 3049, 1695, 1625, 1600, 1565, 1538, 1495, 1440, 1305 & 1239. Melting point (from DCM): 264 °C. Microanalysis: Expected C = 69.35 H = 5.24 N = 16.17. Found – C = 69.01 H = 5.28 N = 16.18.

## $^1\text{H}$ NMR TITRATION CURVES.

### *N*-(2-Acetylamino-phenyl)-acetamide (1).

TBA.Acetate in DMSO- $d_6$  / 0.5% H<sub>2</sub>O.

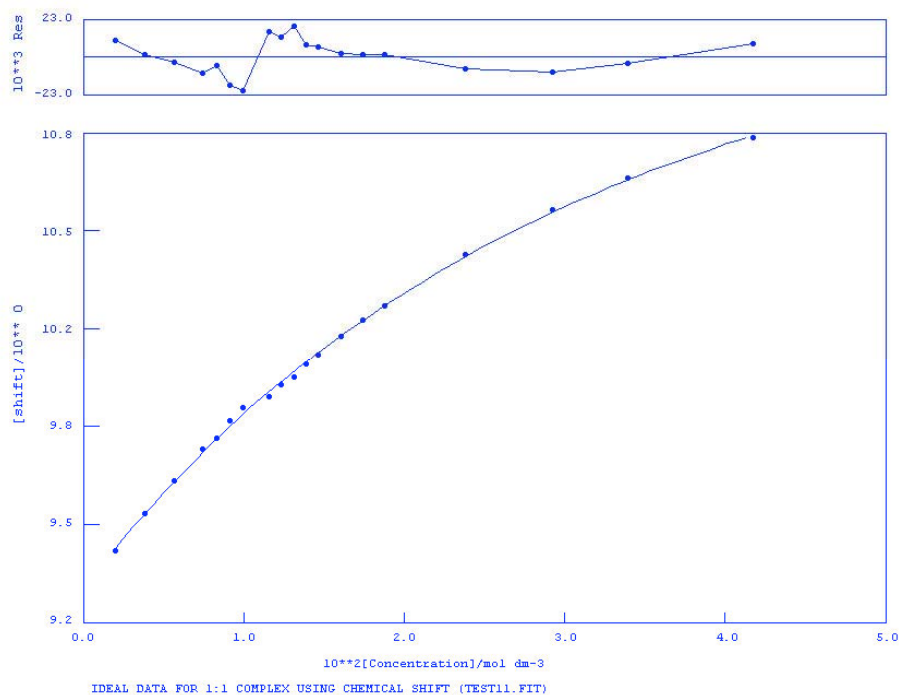

TBA.Benzoate in DMSO- $d_6$  / 0.5% H<sub>2</sub>O.

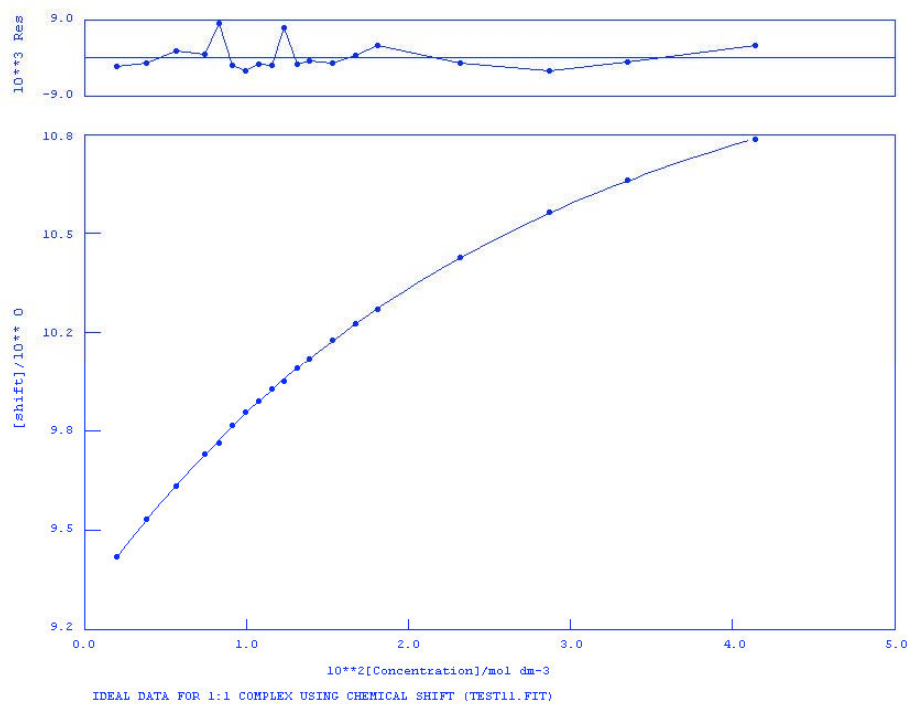

TBA.Chloride in DMSO- $d_6$ / 0.5% H<sub>2</sub>O.

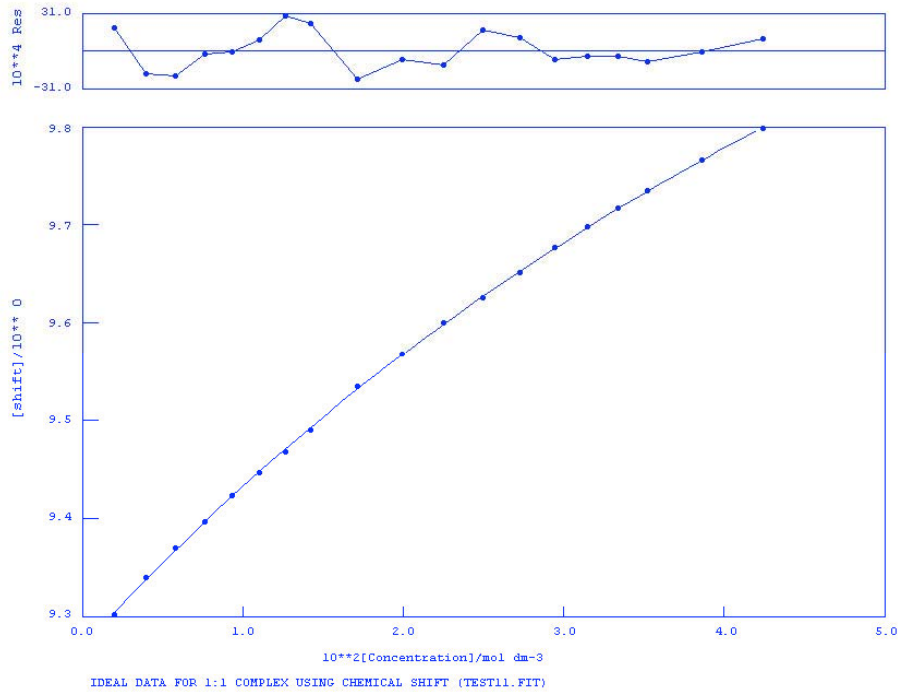

TBA.Dihydrogen Phosphate in DMSO- $d_6$ / 0.5% H<sub>2</sub>O.

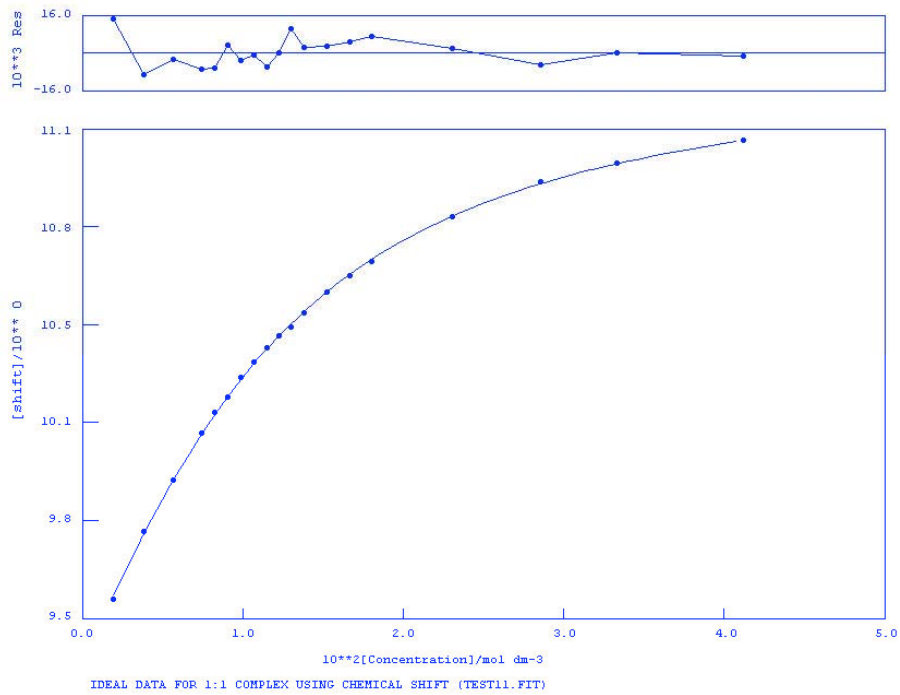

***N,N*-(1,2-phenylene)-bis-(1H-pyrrole-2-carboxamide) (2).**

TBA.Acetate in DMSO-*d*<sub>6</sub>/ 0.5% H<sub>2</sub>O.

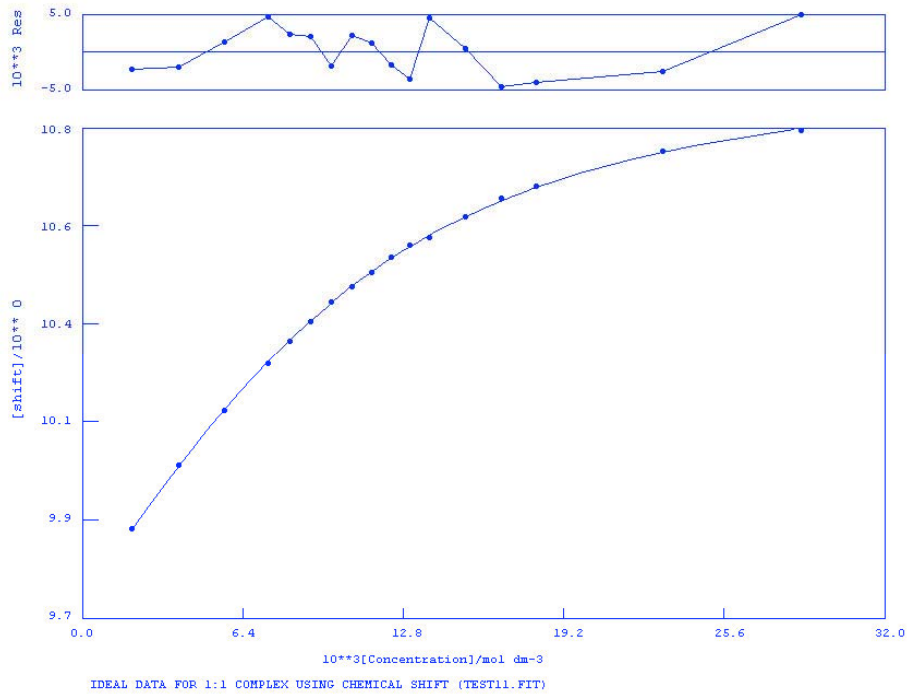

TBA.Benzoate in DMSO-*d*<sub>6</sub>/ 0.5% H<sub>2</sub>O.

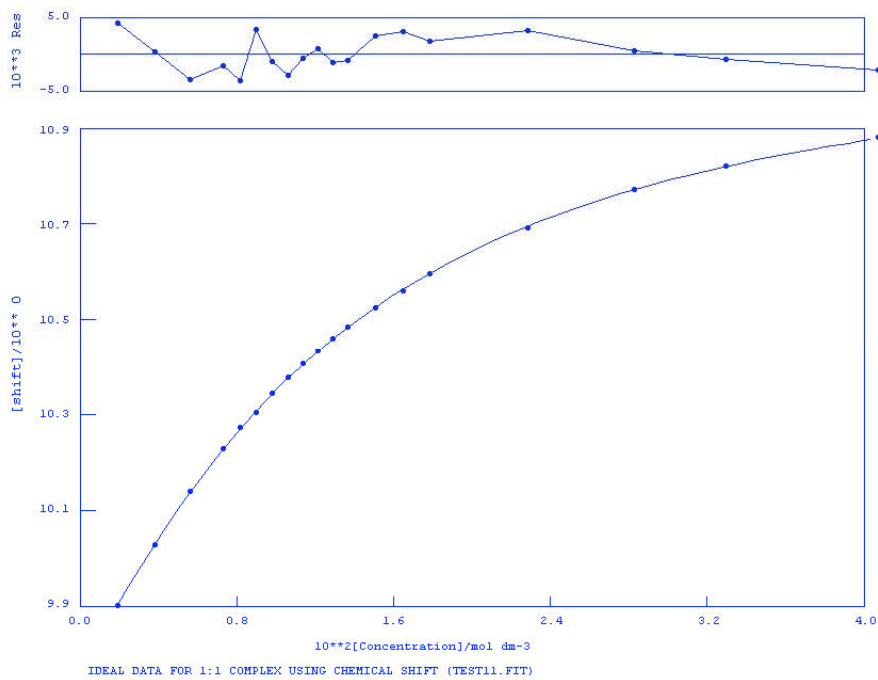

TBA.Chloride in DMSO- $d_6$ / 0.5% H<sub>2</sub>O.

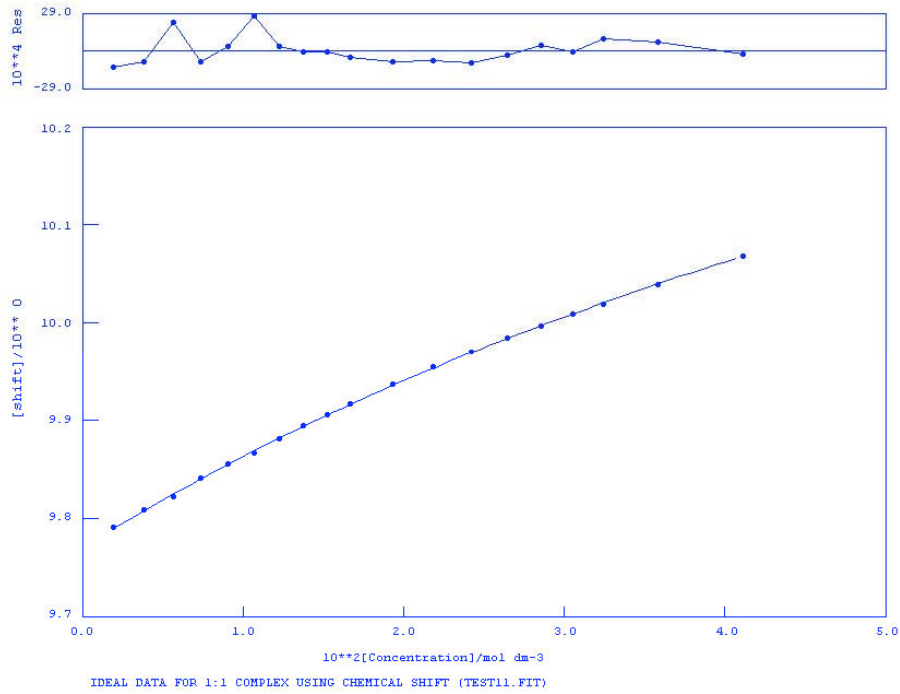

TBA.Dihydrogen Phosphate in DMSO- $d_6$ / 0.5% H<sub>2</sub>O.

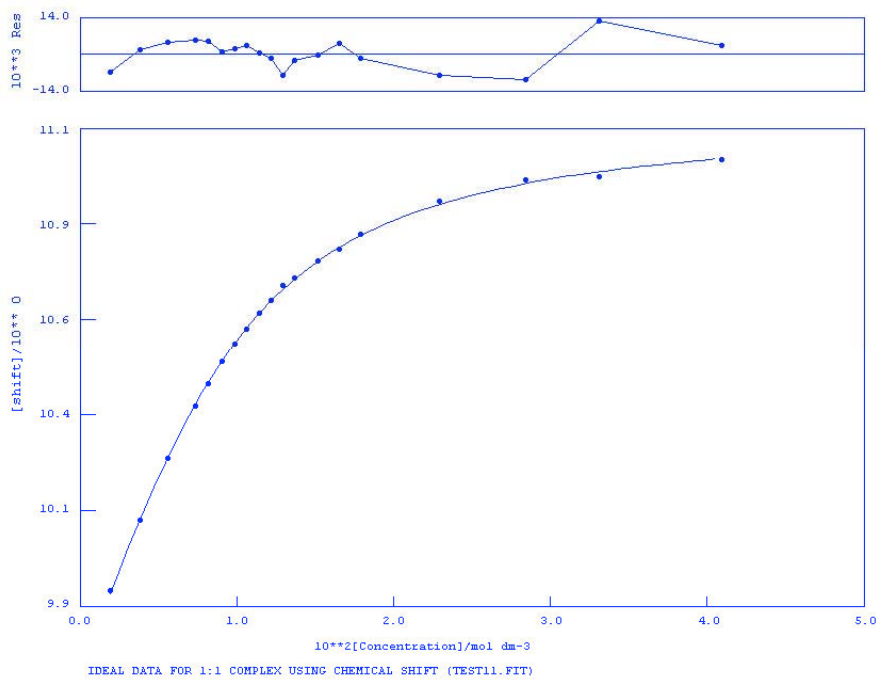

### 1,1'-(1,2-phenylene)bis(3-phenylurea) (3).

TBA.Acetate in DMSO- $d_6$ / 0.5% H<sub>2</sub>O.

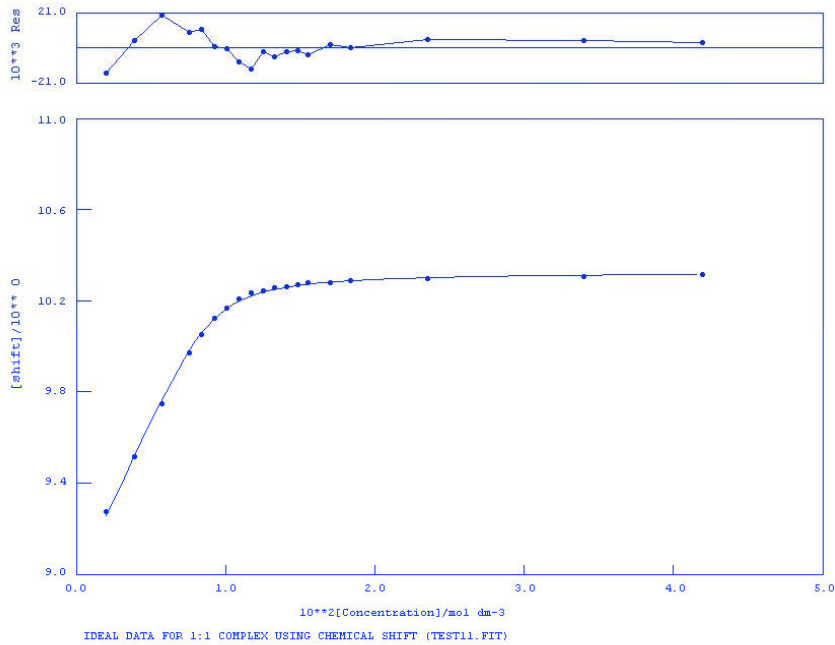

TBA.Benzoate in DMSO- $d_6$ / 0.5% H<sub>2</sub>O.

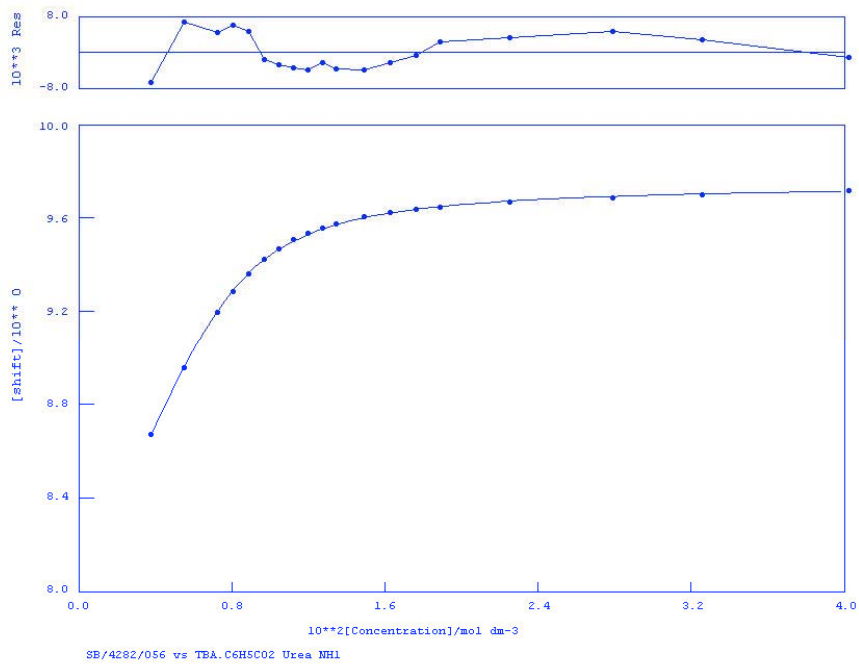

TBA.Bromide in DMSO- $d_6$  / 0.5% H<sub>2</sub>O.

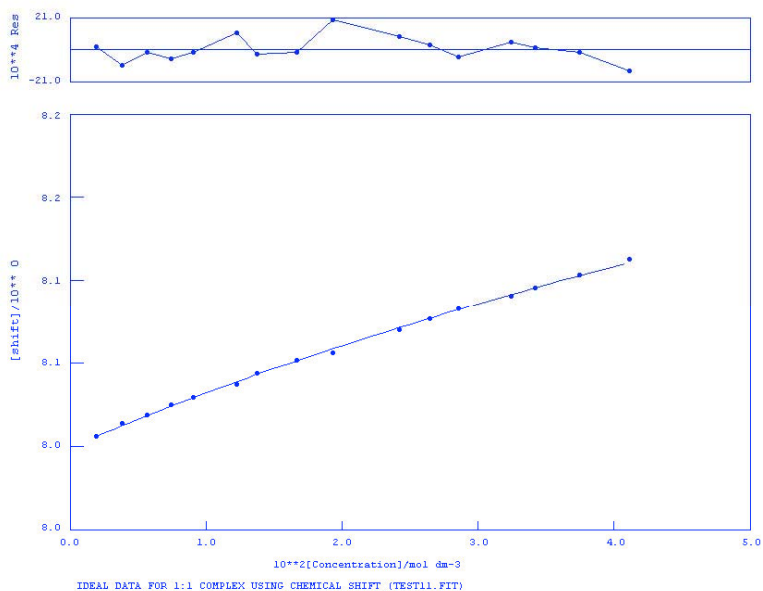

TBA.Chloride in DMSO- $d_6$  / 0.5% H<sub>2</sub>O.

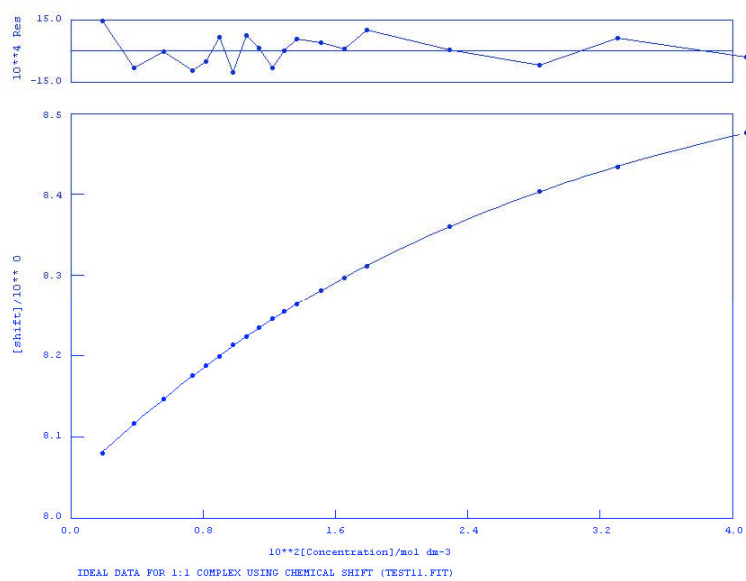

TBA.Dihydrogen Phosphate in DMSO- $d_6$ / 0.5% H<sub>2</sub>O.

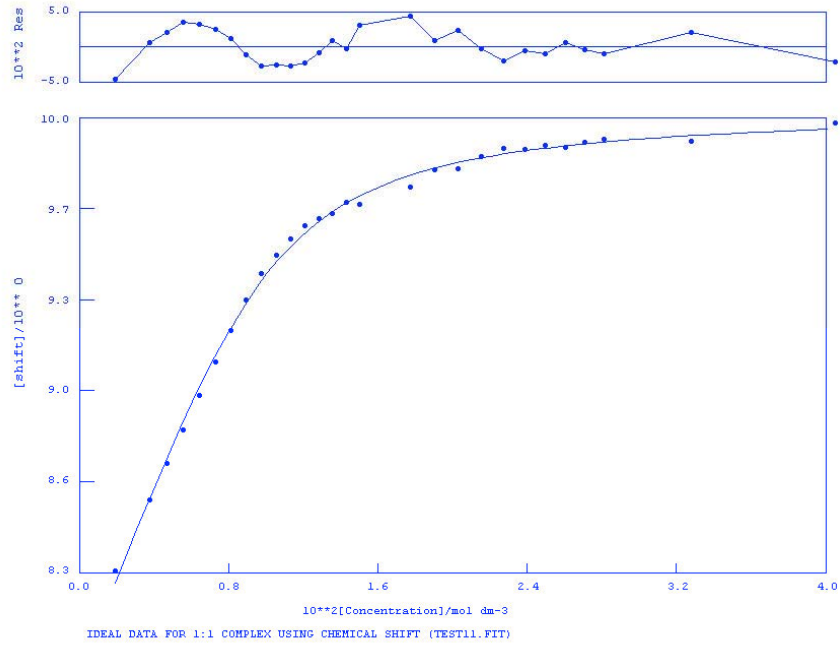

TBA.Hydrogen Sulphate in DMSO- $d_6$ / 0.5% H<sub>2</sub>O.

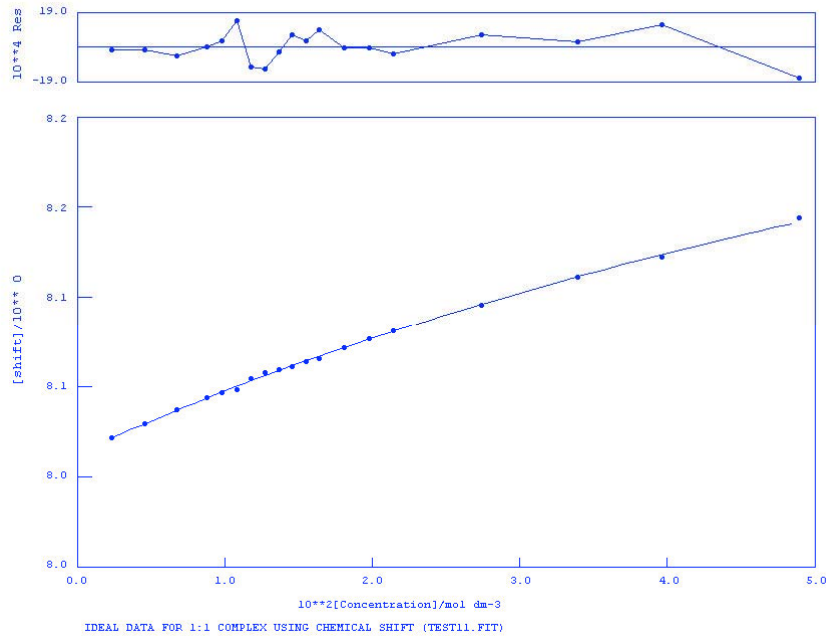

Supplement: b508144k.pdf [file b508144k.pdf]
